# Supplementary material
Source: PubMed Central journal article supplement (PMC8733278)
Supplement: mmc1.pdf [file mmc1.pdf]

**Cell, Volume 185**

**Supplemental information**

**Receptor binding and complex structures**

**of human ACE2 to spike RBD**

**from omicron and delta SARS-CoV-2**

**Pengcheng Han, Linjie Li, Sheng Liu, Qisheng Wang, Di Zhang, Zepeng Xu, Pu Han, Xiaomei Li, Qi Peng, Chao Su, Baihan Huang, Dedong Li, Rong Zhang, Mingxiong Tian, Lutang Fu, Yuanzhu Gao, Xin Zhao, Kefang Liu, Jianxun Qi, George F. Gao, and Peiyi Wang**

**Supplementary tables:**

**Table S1. The immobilization and concentrations statistics of SPR assay, Related to Figure 2**

| Ligand        | Sample          | Immobilization quantity (units) | Concentrations (nM)    |
|---------------|-----------------|---------------------------------|------------------------|
| Prototype-RBD | Human ACE2 (PD) | 3040.0                          | 200, 100, 50, 25, 12.5 |
| Alpha-RBD     | Human ACE2 (PD) | 1934.7                          | 200, 100, 50, 25, 12.5 |
| Beta-RBD      | Human ACE2 (PD) | 3834.4                          | 200, 100, 50, 25, 12.5 |
| Delta-RBD     | Human ACE2 (PD) | 2896.3                          | 200, 100, 50, 25, 12.5 |
| Gamma-RBD     | Human ACE2 (PD) | 2885.3                          | 200, 100, 50, 25, 12.5 |
| Omicron-RBD   | Human ACE2 (PD) | 3632.5                          | 200, 100, 50, 25, 12.5 |
| GD/1/2019-RBD | Human ACE2 (PD) | 1415.9                          | 200, 100, 50, 25, 12.5 |

**Table S2. Crystallographic data collection and refinement statistics, Related to Figure 3**

|                                                     | Omicron RBD/hACE2                | Delta RBD/hACE2        |
|-----------------------------------------------------|----------------------------------|------------------------|
| <b>Data collection</b>                              |                                  |                        |
| Space group                                         | P4 <sub>1</sub> 2 <sub>1</sub> 2 | P2 <sub>1</sub>        |
| Cell dimensions                                     |                                  |                        |
| <i>a</i> , <i>b</i> , <i>c</i> (Å)                  | 104.24, 104.24, 227.18           | 89.77, 143.65, 106.41  |
| $\alpha$ , $\beta$ , $\gamma$ (°)                   | 90.00, 90.00, 90.00              | 90.00, 95.29, 90.00    |
| Resolution (Å)                                      | 50.00-3.00 (3.11-3.00)           | 50.00-3.35 (3.47-3.35) |
| Unique reflections                                  | 25810 (2509)                     | 38716 (3873)           |
| Completeness (%)                                    | 99.9 (100)                       | 100.0 (100.0)          |
| <i>R</i> <sub>merge</sub>                           | 0.186 (1.067)                    | 0.162 (1.307)          |
| <i>I</i> / $\sigma$ <i>I</i>                        | 10.6 (1.8)                       | 9.4 (1.1)              |
| CC <sub>1/2</sub>                                   | 0.992 (0.692)                    | 0.992 (0.825)          |
| Redundancy                                          | 7.8 (7.7)                        | 7.0 (7.2)              |
| <b>Refinement</b>                                   |                                  |                        |
| Resolution (Å)                                      | 46.62-3.00                       | 44.70-3.35             |
| No. reflections                                     | 25274                            | 38489                  |
| <i>R</i> <sub>work</sub> / <i>R</i> <sub>free</sub> | 0.2006/0.2324                    | 0.1987/0.2398          |
| No. atoms                                           |                                  |                        |
| Protein                                             | 6532                             | 13024                  |
| Ligand/ion                                          | 1                                | 2                      |
| Water                                               | 0                                | 0                      |
| <i>B</i> -factors                                   |                                  |                        |
| Protein                                             | 59.2                             | 120.0                  |
| Ligand/ion                                          | 80.3                             | 108.6                  |
| Water                                               |                                  |                        |
| R.M.S. deviations                                   |                                  |                        |

|                            |       |       |
|----------------------------|-------|-------|
| Bond lengths (Å)           | 0.004 | 0.012 |
| Bond angles (°)            | 0.596 | 1.285 |
| Ramchandran Statistics (%) |       |       |
| Favored                    | 97.46 | 94.6  |
| Allowed                    | 2.29  | 5.34  |
| Disallowed                 | 0.25  | 0.06  |

---

Values in parentheses are for highest-resolution shell.

**Table S3. Cryo-EM data processing and refinement statistics, Related to Figure 3**

| <b>Data Collection &amp; Processing</b>      |                 |
|----------------------------------------------|-----------------|
| Microscope                                   | TFS Titan Krios |
| Camera                                       | K3              |
| Magnification                                | 74593           |
| Voltage (kV)                                 | 300             |
| Total dose (e <sup>-</sup> /Å <sup>2</sup> ) | 60              |
| Defocus range (µm)                           | -1.3 to -2.3    |
| Pixel size, Å per pixel                      | 0.67            |
| Symmetry imposed                             | C1              |
| Final particles images                       | 110,912         |
| Map resolution (Å, FSC=0.143)                | 3.4             |
| Map sharpening B factor (Å <sup>2</sup> )    | -200            |
| Map resolution range (Å, FSC=0.143)          | 2.8-5.0         |
| <b>Refinement</b>                            |                 |
| Initial model used (PDB code)                | 6LZG            |
| Non-hydrogen atoms                           | 6484            |
| Protein residues                             | 791             |
| Validation                                   |                 |
| Clash score                                  | 6.79            |
| Poor rotamers (%)                            | 0.72            |
| R.m.s. deviations                            |                 |
| Bond lengths (Å)                             | 0.004           |
| Bond angles (°)                              | 0.589           |
| Ramachandran statistics (%)                  |                 |
| Most favored                                 | 96.06           |
| Allowed                                      | 3.56            |
| Outliers                                     | 0.38            |
